# Supplementary material for: Spiral formation at the microscale by μ-pyro-electrospinning
Source: Royal Society of Chemistry journal article supplement (doi:10.1039/c6sm00156d), 2016-01-01
Supplement: c6sm00156d4.pdf [file c6sm00156d4.pdf]

# Spiral formation at microscale by $\mu$ -pyro-electrospinning

*L. Mecozzi<sup>1</sup>, O. Gennari<sup>1</sup>, R. Rega<sup>1</sup>, S. Grilli<sup>1\*</sup>, S. Bhowmick<sup>2</sup>, M.A. Gioffrè<sup>2</sup>, G. Coppola<sup>2</sup>, P. Ferraro<sup>1</sup>*

<sup>1</sup>Institute of Applied Sciences & Intelligent Systems of the National Council of Research (CNR-ISASI)  
Via Campi Flegrei 34, 80078 Pozzuoli (NA), Italy

<sup>2</sup>Institute of Microelectronics and Microsystems of the National Council of Research (CNR-IMM)  
Via P. Castellino 111, 80131 Napoli, Italy

## Supplementary Movies

The Supplementary Movies 1,2,3 show the side view of the typical fibre spiralling during  $\mu$ -PES in case of 2 %, 15 % and 9 % PMMA in anisole (wt/wt), respectively. The movies were slowed down for better visualization.
